# Supplementary material for: An Investigation into the Antiobesity Effects of Morinda citrifolia L. Leaf Extract in High Fat Diet Induced Obese Rats Using a 1H NMR Metabolomics Approach
Source: PubMed Central journal article supplement (PMC4698747; doi:10.1155/2016/2391592), 2015-12-20
Supplement: 2391592.f1.pdf [file 2391592.f1.pdf]

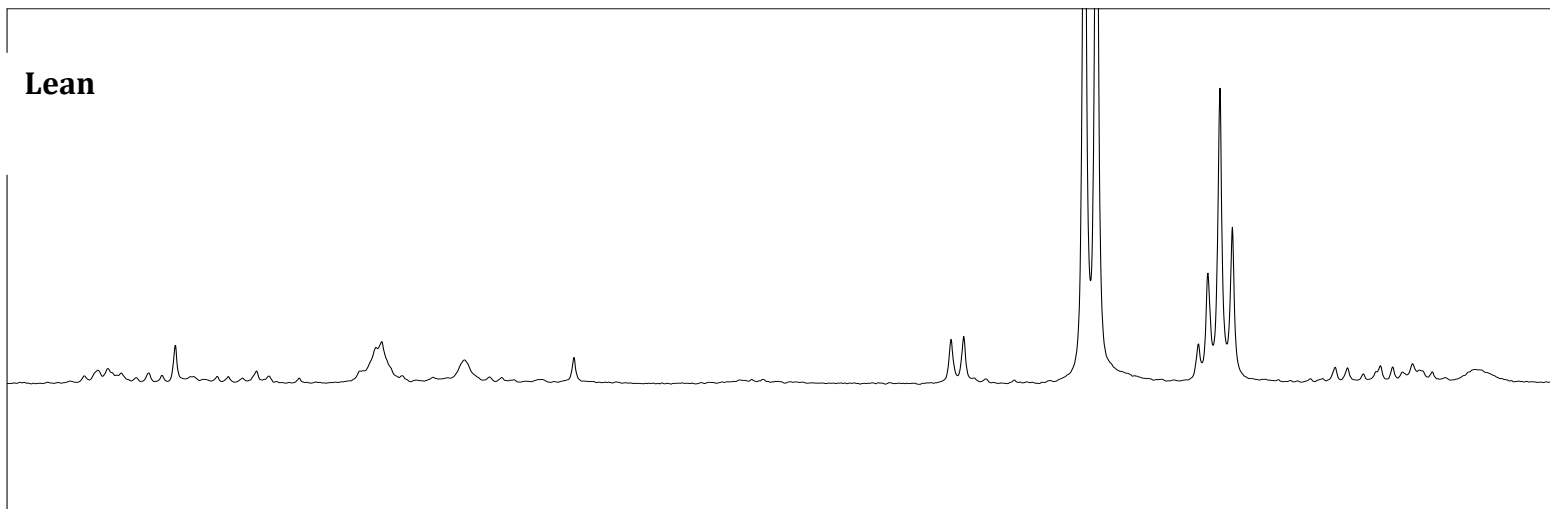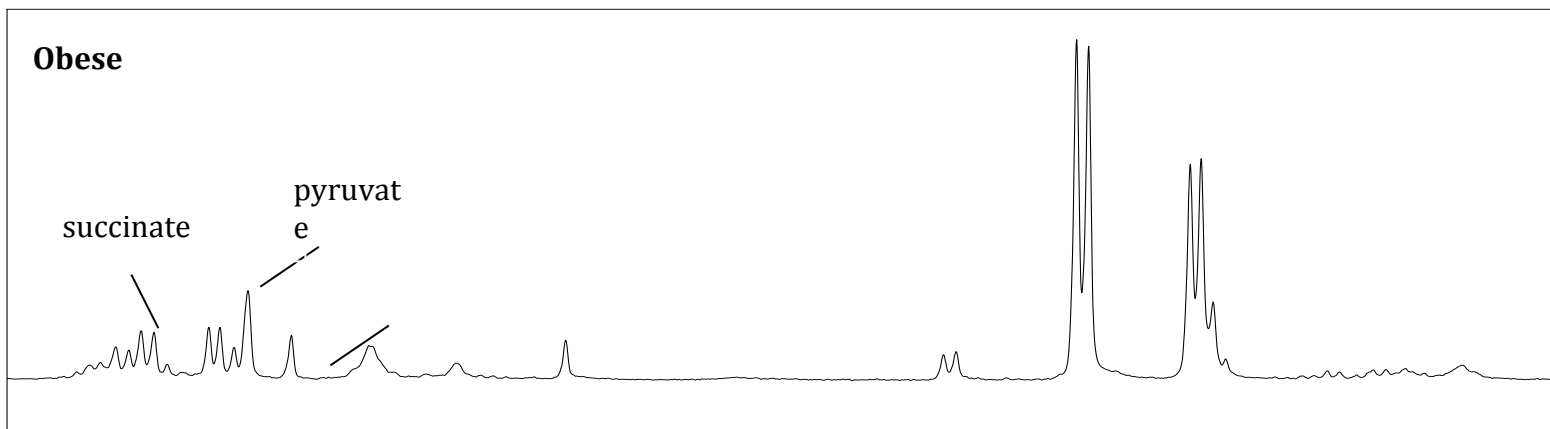

2.50 ppm (f1) 2.00 1.50 1.00

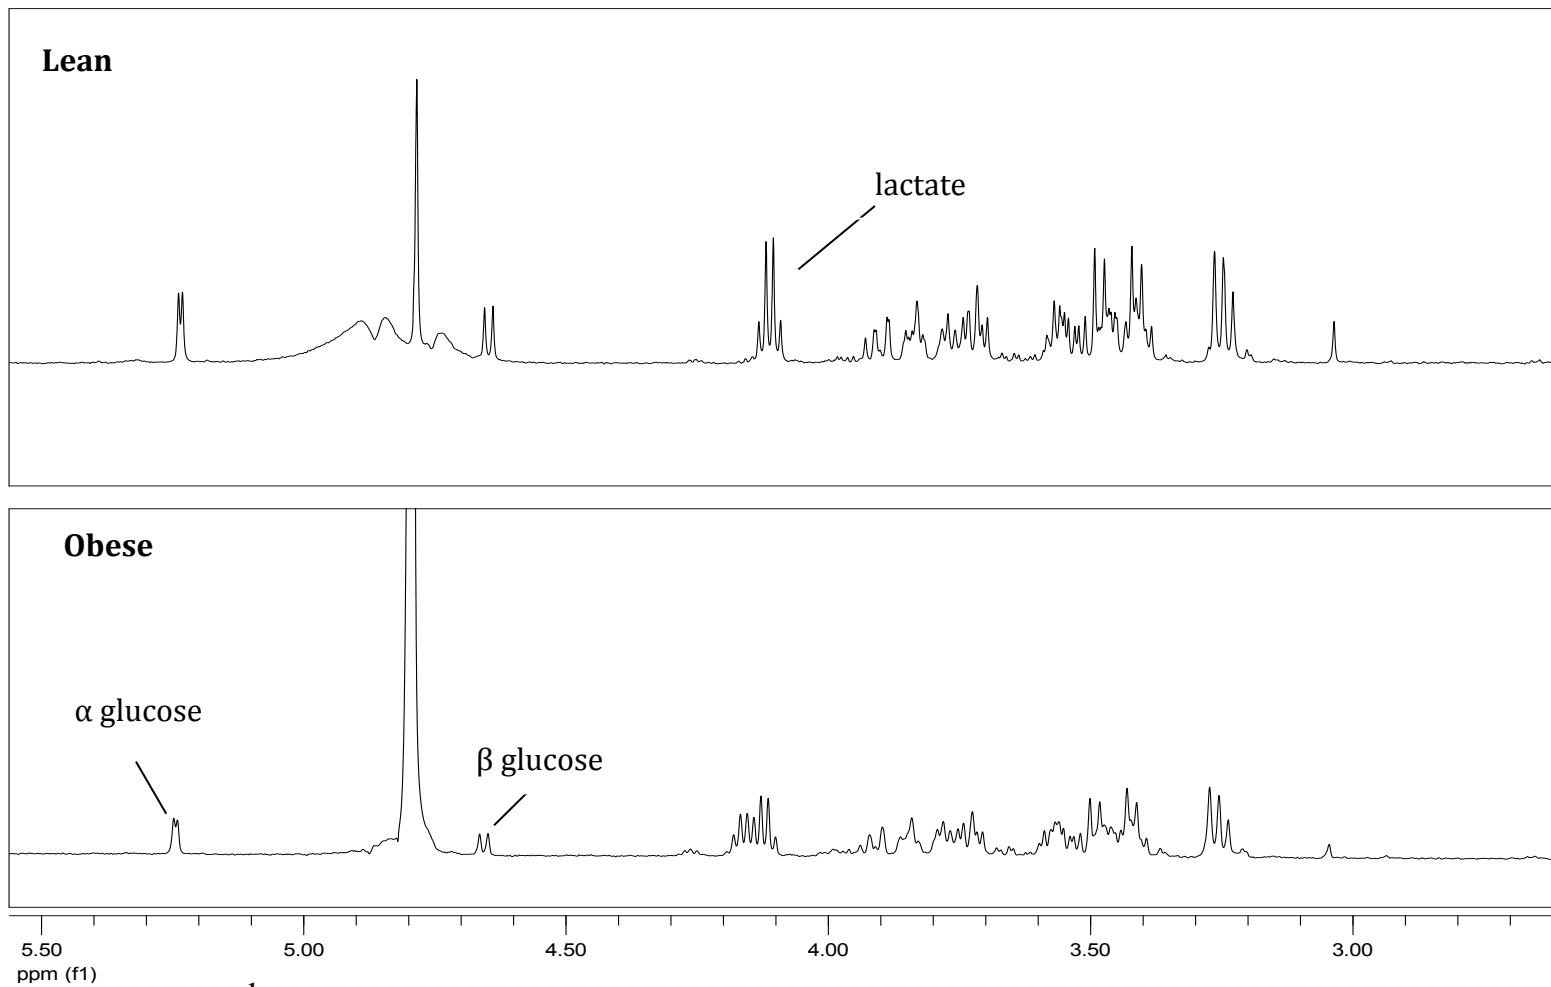

**Typical 500 MHz  $^1\text{H}$  NMR spectra of serum collected from a Sprague- Dawley rat fed a normal diet (lean) and a Sprague- Dawley rat fed a high fat diet (obese) with expanded regions at  $\delta$  1.00 – 2.50 and  $\delta$  3.00 – 5.50 ppm.**

**Obese**

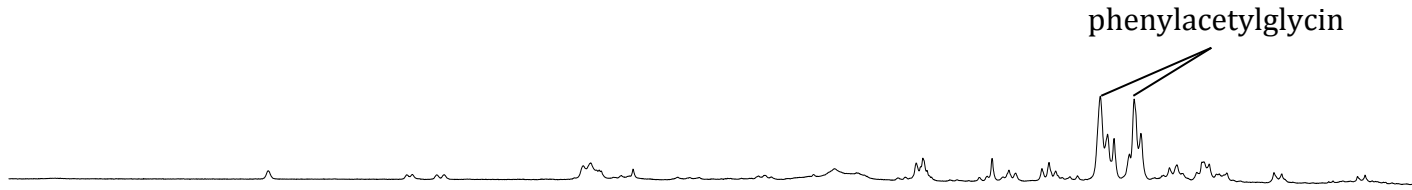

**Lean**

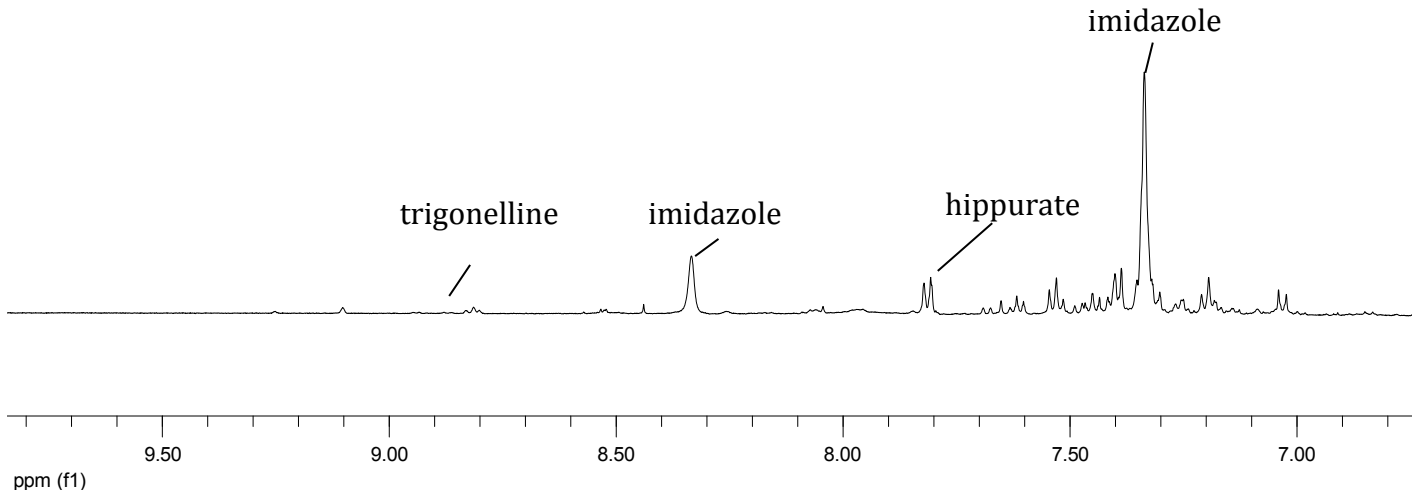

### Obese

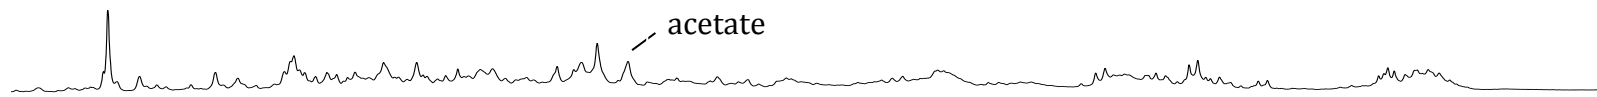

### Lean

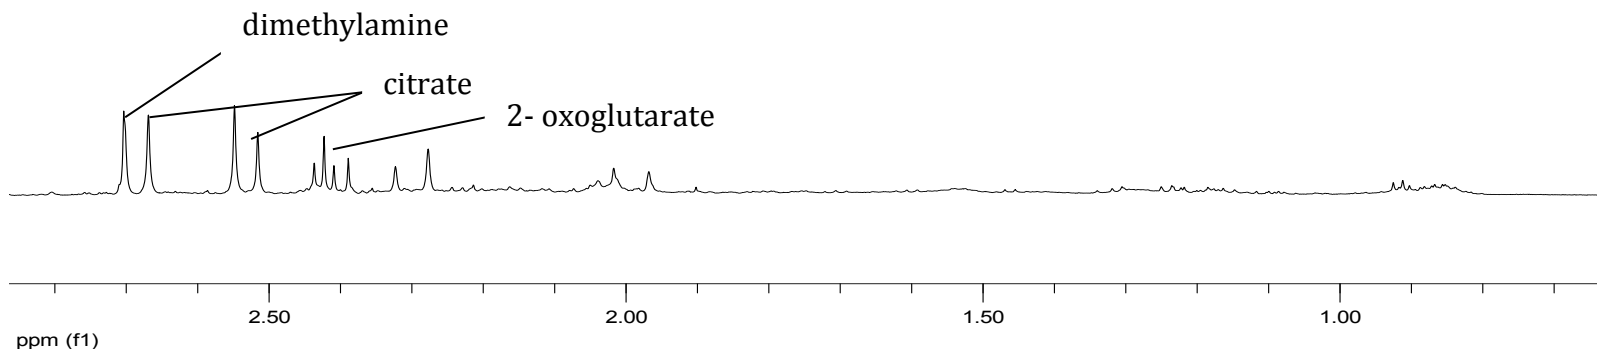

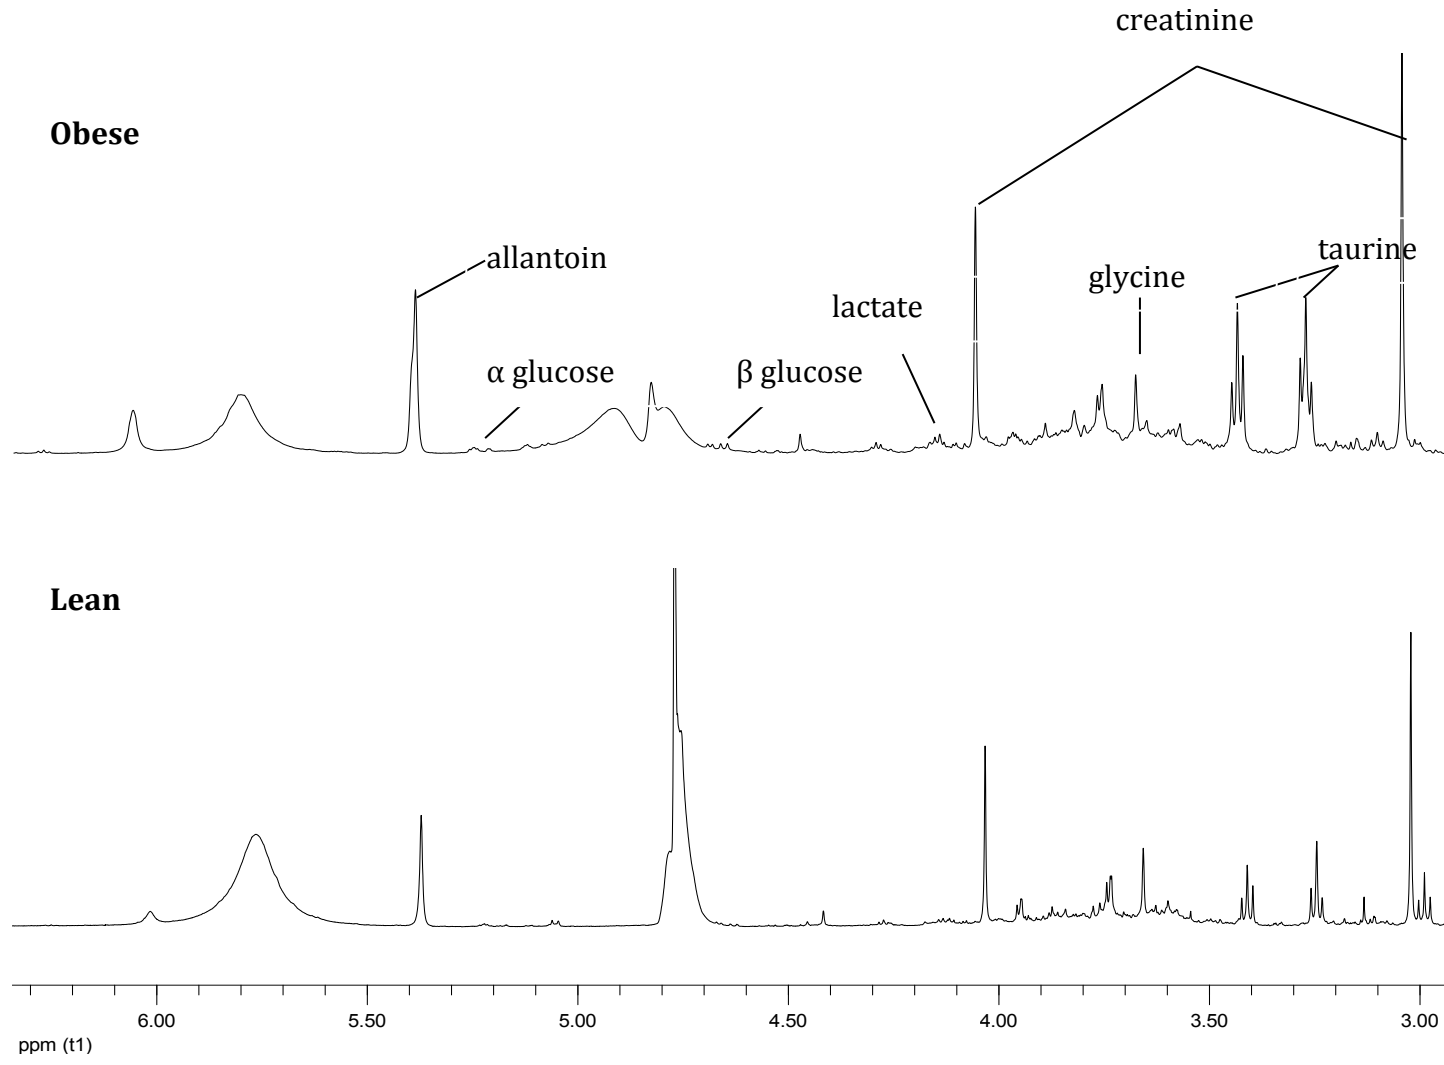

Typical 500 MHz  $^1\text{H}$  NMR spectra of urine Typical 500 MHz  $^1\text{H}$  NMR spectra of urine collected from a Sprague- Dawley rat fed a high fat diet (obese) and a Sprague- Dawley rat fed a normal diet (lean)) with expanded regions at  $\delta$  7.00 – 9.50,  $\delta$  1.00 – 2.50 and  $\delta$  3.00 – 6.00 ppm.
